# Supplementary material for: Fast adsorption of methylene blue, basic fuchsin, and malachite green by a novel sulfonic-grafted triptycene-based porous organic polymer
Source: Royal Society of Chemistry journal article supplement (doi:10.1039/c8ra09012b), 2018-01-01
Supplement: c8ra09012b1.pdf [file c8ra09012b1.pdf]

## Supporting Information(SI)

### Fast adsorption of methylene blue, basic fuchsin, and malachite green by a novel sulfonic-grafted triptycene-based porous organic polymer

Cheng Li,<sup>a</sup> Yan He,<sup>\*a,b</sup> Li Zhou,<sup>a</sup> Ting Xu,<sup>a</sup> Jun Hu,<sup>a</sup> Changjun Peng,<sup>\*a</sup> Honglai Liu<sup>a</sup>

*a:Key Laboratory for Advanced Materials and Department of Chemistry, East China University of Science and Technology, Shanghai, 200237, China*

*b.Jiangxi Province Key Laboratory of Polymer Micro/Nano Manufacturing and Devices, School of Chemistry, Biology and Materials Science, East China University of Technology, Nanchang 330013, People's Republic of China*

**Fig. S1** XRD of TPP-SO<sub>3</sub>H.

**Fig. S2** TGA of TPP-SO<sub>3</sub>H.

**Fig. S3** FT-IR for TPPs and TPP-SO<sub>3</sub>H.

**Fig. S4** XPS survey spectra of TPP and TPP-SO<sub>3</sub>H.

**Fig. S5** <sup>13</sup>C CP/MAS NMR spectrum of TPPs and TPP-SO<sub>3</sub>H.

**Fig. S6** The plots of the pseudo-first-order kinetics for the adsorption of MEB, BF, and MG.

**Fig. S7** The ESP surfaces of TPP-SO<sub>3</sub>H and dyes MEB, BF, and MG.

**Fig. S8** Optimized structures for the complexes.

**Fig. S9** Adsorption isotherms of MEB, BF, and MG on TPP and TPP-SO<sub>3</sub>H based on Freundlich isotherm model.

**Table S1** The porosity properties of TPP-SO<sub>3</sub>H and TPP.

**Table S2** Comparison of MEB, BF and MG equilibrium rate constants among different adsorbents.

**Table S3** Adsorption kinetic model parameters for MEB, BF, and MG.

**Table S4** Parameters of Langmuir's equation and Freundlich model's equation base on TPP-SO<sub>3</sub>H.

**Fig. S1**

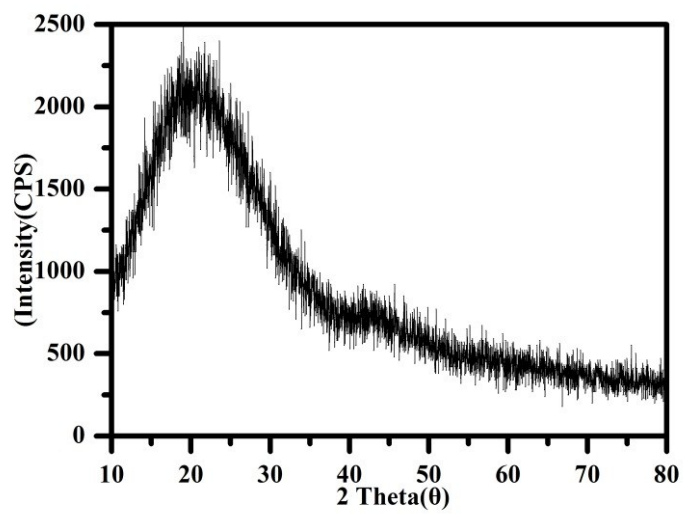

Fig. S1 XRD of TPP-SO<sub>3</sub>H

**Fig. S2**

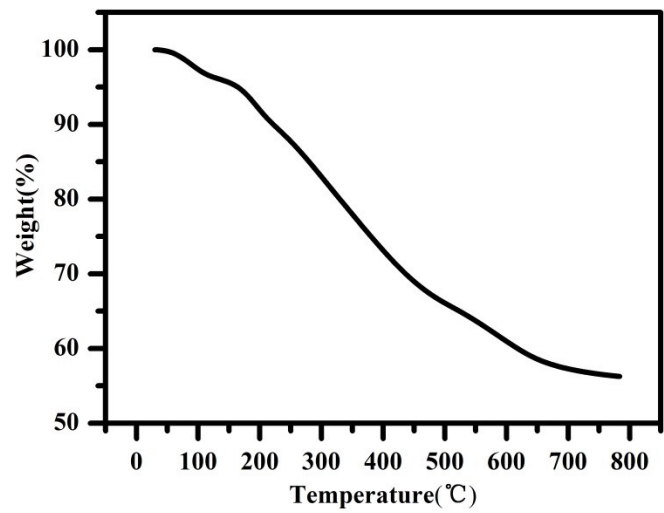

Fig. S2 TGA of TPP-SO<sub>3</sub>H

**Fig. S3**

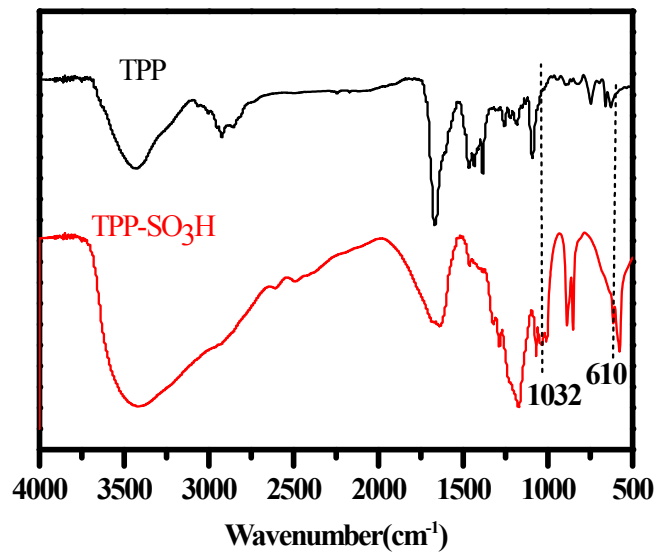

Fig. S3 FT-IR spectra of TPP (Black), TPP-SO<sub>3</sub>H (red)

**Fig. S4**

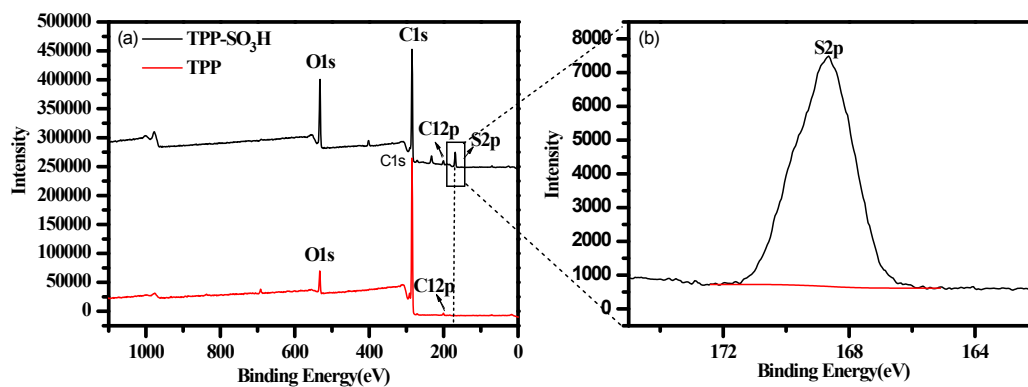

Fig. S4 XPS survey spectra of (a) TPP and TPP-SO<sub>3</sub>H; (b) S2p spectra of TPP-SO<sub>3</sub>H

Fig. S5

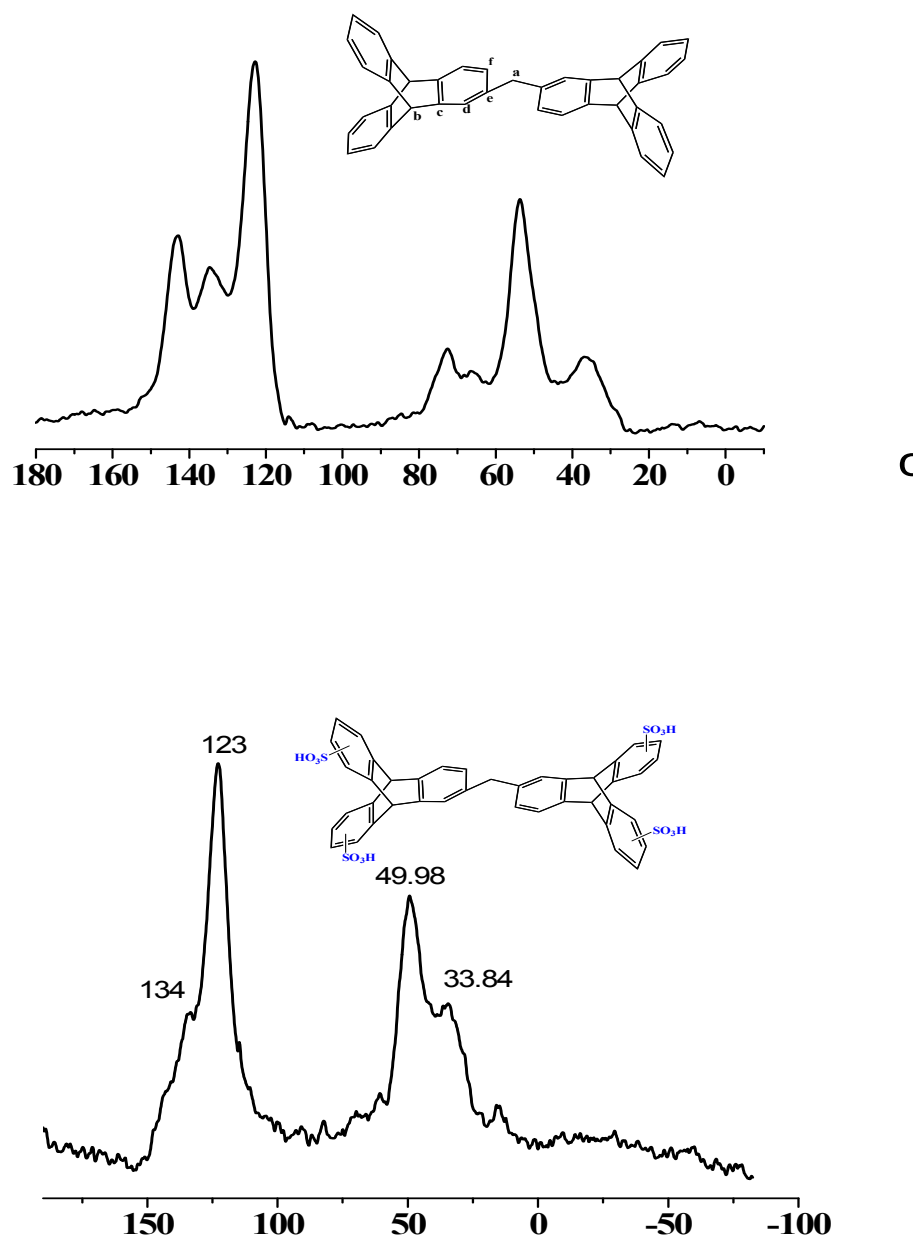

Fig. S5  $^{13}\text{C}$  CP/MAS NMR spectrum of TPP and TPP-SO<sub>3</sub>H

Fig. S6

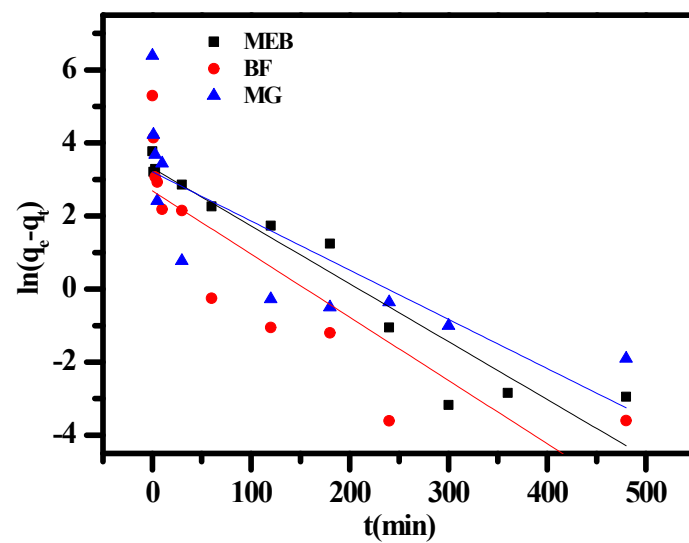

Fig. S6 The plots of the pseudo-first-order kinetics for the adsorption of MEB, BF and MG.

**Fig. S7**

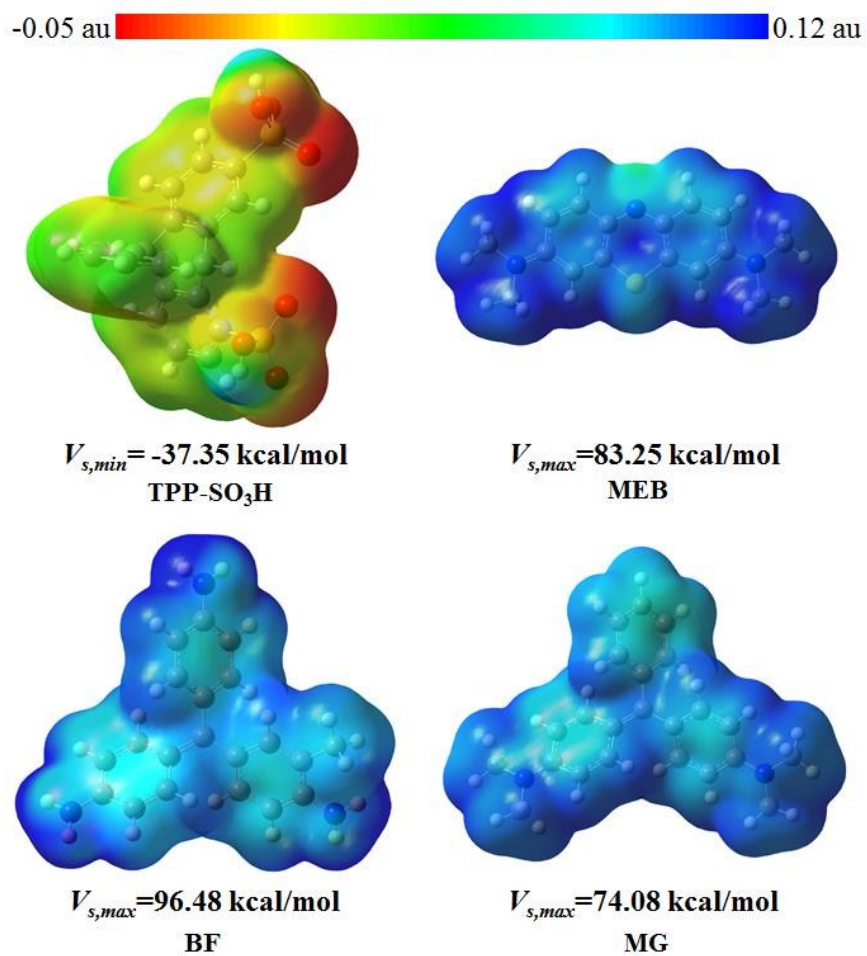

Fig. S7 The ESP surfaces of TPP-SO<sub>3</sub>H and dyes MEB, BF and MG

It is well-known that in the diagrams of ESP surfaces, red represents negative ESP which has an ability to absorb cations. On the contrary, blue means positive ESP to absorb anions.



**Fig. S8**

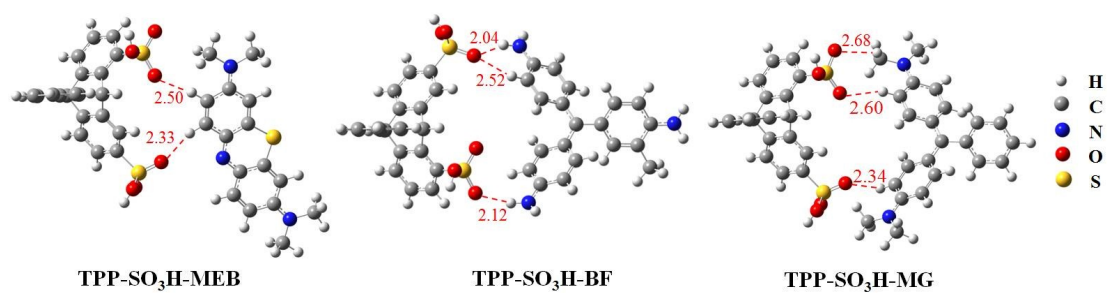

Fig. S8 Optimized structures for the complexes (unit is Å)

Fig. S9

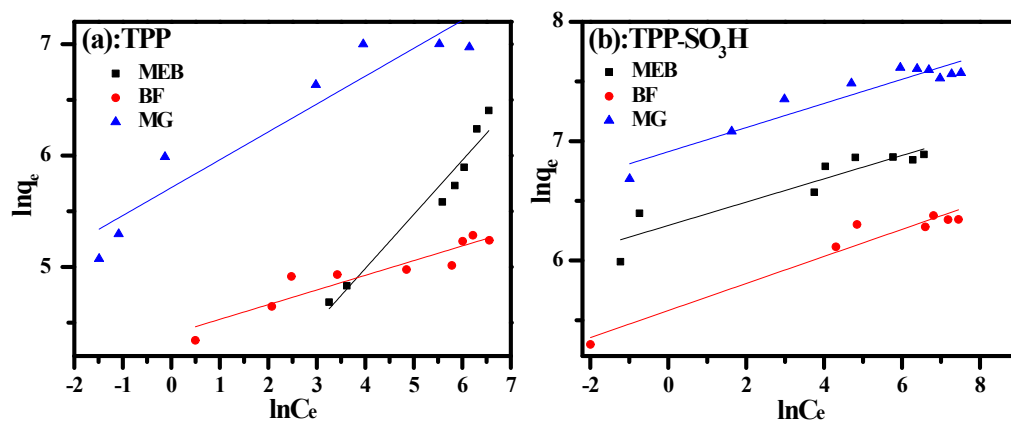

Fig. S9 Adsorption isotherms of MEB, BF and MG on TPP and TPP-SO<sub>3</sub>H based on Freundlich isotherm model

Table S1

Table S1 The porosity properties of TPP-SO<sub>3</sub>H

| Polymer               | SA <sub>BET</sub> <sup>a</sup> (m <sup>2</sup> ·g <sup>-1</sup> ) | V <sub>t</sub> <sup>b</sup> (cm <sup>3</sup> ·g <sup>-1</sup> ) | V <sub>m</sub> <sup>c</sup> (cm <sup>3</sup> ·g <sup>-1</sup> ) | % V <sub>m</sub> /V <sub>t</sub> |
|-----------------------|-------------------------------------------------------------------|-----------------------------------------------------------------|-----------------------------------------------------------------|----------------------------------|
| TPP-SO <sub>3</sub> H | 573.3                                                             | 0.3084                                                          | 0.2299                                                          | 70.5                             |
| TPP                   | 1220.1                                                            | 0.9633                                                          | 0.1941                                                          | 20.2                             |

a: surface area calculated by the BET equation; b: pore volume at  $p/p_0 = 0.99$ ; c: micropore volume obtained by t-plot.

Table S2

Table S2 Comparison of MEB, BF and MG equilibrium rate constants among different adsorbents

| Adsorbents                                       | equilibrium rate constants $K_2$ ( $\text{g}\cdot\text{mg}^{-1}\cdot\text{min}^{-1}$ ) |                      |                      | Ref.      |
|--------------------------------------------------|----------------------------------------------------------------------------------------|----------------------|----------------------|-----------|
|                                                  | MEB                                                                                    | BF                   | MG                   |           |
| CMt                                              | $1\times 10^{-3}$                                                                      | /                    | /                    | 1         |
| porous carbon                                    | $4.6\times 10^{-4}$                                                                    | /                    | /                    | 2         |
| MIL-100-SO <sub>3</sub> H                        | $4.11\times 10^{-4}$                                                                   | /                    | $3.25\times 10^{-4}$ | 3         |
| calcium alginate membrane                        | $9.515\times 10^{-5}$                                                                  | /                    | /                    | 4         |
| Fe <sub>3</sub> O <sub>4</sub> @ AMCA-MIL-53(Al) | $7.5\times 10^{-4}$                                                                    | /                    | $1.4\times 10^{-3}$  | 5         |
| TSF-HMMS                                         | $2\times 10^{-3}$                                                                      | /                    | /                    | 6         |
| bottom ash                                       | /                                                                                      | $9.79\times 10^{-4}$ | /                    | 7         |
| TPP-SO <sub>3</sub> H                            | $2.6\times 10^{-3}$                                                                    | $1.49\times 10^{-2}$ | $9.3\times 10^{-3}$  | This work |

Table S3

Table S3 Adsorption kinetic model parameters for MEB , BF, and MG

| Dyes | $q_{eq}(exp)$<br>( $mg \cdot g^{-1}$ ) | Pseudo-first-order kinetic model    |                 |       | Pseudo-second-order kinetic model   |                                       |       |
|------|----------------------------------------|-------------------------------------|-----------------|-------|-------------------------------------|---------------------------------------|-------|
|      |                                        | $q_e(cal)$<br>( $mg \cdot g^{-1}$ ) | $K_1(min^{-1})$ | $R^2$ | $q_e(cal)$<br>( $mg \cdot g^{-1}$ ) | $K_2(g \cdot mg^{-1} \cdot min^{-1})$ | $R^2$ |
| MEB  | 199.44                                 | 27.47                               | 0.0158          | 0.907 | 199.60                              | 0.0026                                | 0.997 |
| BF   | 198.36                                 | 24.84                               | 0.0173          | 0.698 | 198.02                              | 0.0149                                | 0.999 |
| MG   | 596.77                                 | 14.71                               | 0.0135          | 0.628 | 591.72                              | 0.0093                                | 0.999 |

Table S4

Table S4 The parameters of the adsorption isotherms of MEB, BF, and MG on TPP-SO<sub>3</sub>H and TPP based on Langmuir and Freundlich isotherm model

|                       | Dyes | $q_{eq}(\text{exp})$<br>(mg·g <sup>-1</sup> ) | Langmuir model                                |                                      |       | Freundlich model |                                      |       |
|-----------------------|------|-----------------------------------------------|-----------------------------------------------|--------------------------------------|-------|------------------|--------------------------------------|-------|
|                       |      |                                               | $q_{eq}(\text{cal})$<br>(mg·g <sup>-1</sup> ) | $K_L(\text{g} \cdot \text{mg}^{-1})$ | $R^2$ | $1/n_F$          | $K_F(\text{mg} \cdot \text{g}^{-1})$ | $R^2$ |
| TPP                   | MEB  | 177.99                                        | 178.89                                        | 0.079                                | 0.998 | 0.485            | 20.994                               | 0.946 |
|                       | BF   | 197.01                                        | 196.08                                        | 0.103                                | 0.997 | 0.132            | 81.280                               | 0.861 |
|                       | MG   | 1077.04                                       | 1079.42                                       | 0.515                                | 0.999 | 0.250            | 302.348                              | 0.887 |
| TPP-SO <sub>3</sub> H | MEB  | 981.81                                        | 983.43                                        | 0.308                                | 0.999 | 0.070            | 626.714                              | 0.840 |
|                       | BF   | 586.16                                        | 588.24                                        | 0.224                                | 0.999 | 0.113            | 265.316                              | 0.937 |
|                       | MG   | 1942.50                                       | 1947.02                                       | 0.162                                | 0.999 | 0.101            | 1003.702                             | 0.887 |

## References:

- 1 D. S. Tong, C. W. Wu, M. O. Adebajo, J. C. Jin, W. H. Yu, S. F. Ji, C. H. Zhou, *Applied Clay Science*, 2018, **161**,256–264.
- 2 B. Chen, Z. Yang, G. Ma, D. Kong, W. Xiong, J. Wang, Y. Zhu, Y. Xia, *Microporous Mesoporous Mater.*, 2018, **257**,1–8.
- 3 X. P. Luo, S. Y. Fu, Y. M. Du, J. Z. Guo, B. Li, *Microporous Mesoporous Mater.*, 2017, **237**,268–274.
- 4 Q. Li, Y. Li, X. Ma, Q. Du, K. Sui, D. Wang, C. Wang, H. Li, Y. Xia, *Chem. Eng. J.*, 2017, **316**,623–630.
- 5 A. A. Alqadami, M. Naushad, Z. A. Alothman, T. Ahamad, *J. Environ. Manage.*, 2018, **223**,29–36.
- 6 H. Zhang, X. Li, G. He, J. Zhan, and D. Liu. *Ind. Eng. Chem. Res.*, 2013, **52**, 16902–16910.
- 7 V. K. Gupta, A. Mittal, V. Gajbe, J. Mittal, *J. Colloid Interf. Sci.*, 2008, **319**, 30–39.
